# Supplementary material for: Laboratory observations of slow earthquakes and the spectrum of tectonic fault slip modes
Source: PubMed Central journal article supplement (PMC4821871; doi:10.1038/ncomms11104), 2016-03-31
Supplement: ncomms11104-s1.pdf [file ncomms11104-s1.pdf]

## Supplementary Figures

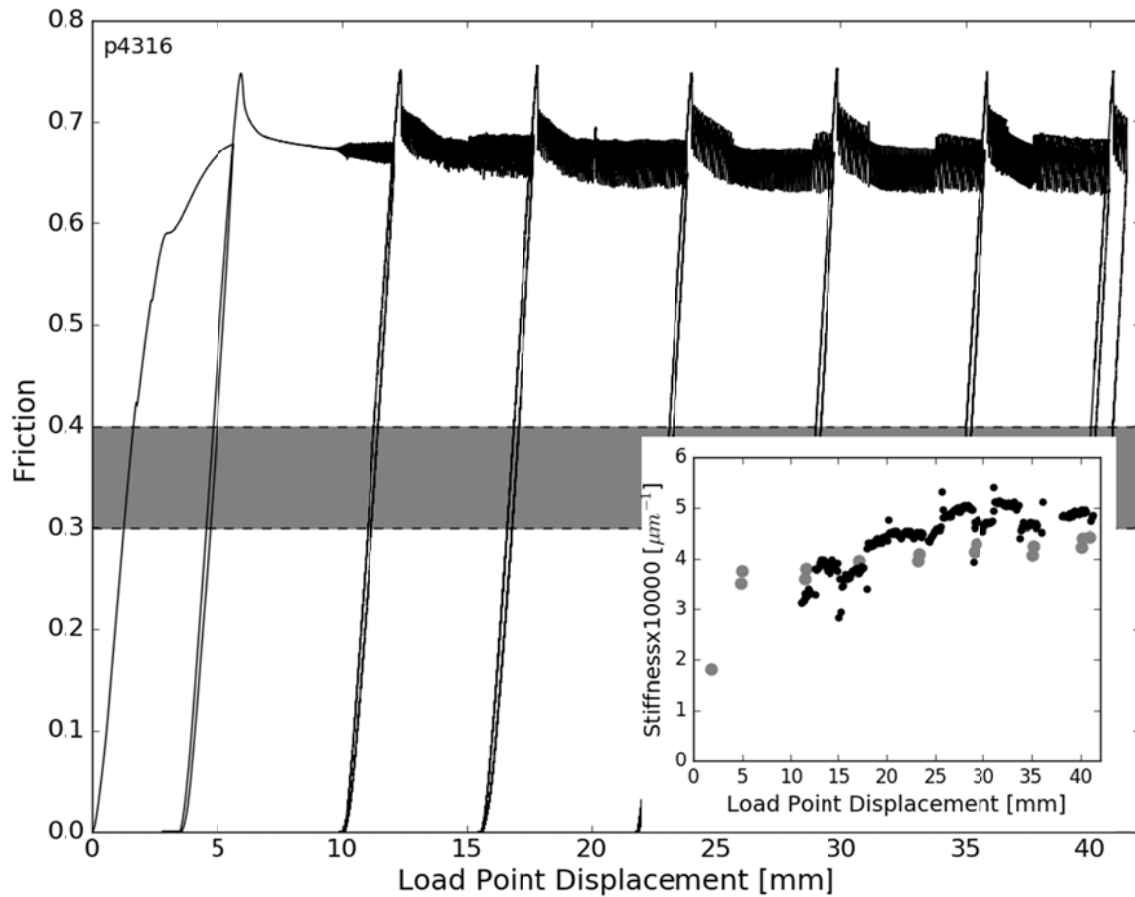

**Supplementary Figure 1 – Stiffness during an experiment.** Friction data for one complete experiment (run p4316) with shear load-unload cycles. Slow slip events emerge spontaneously at a displacement of  $\sim 8.5$  mm. (Inset) Stiffness measured from unload-reload cycles in the range  $\mu=0.3-0.4$  (large grey circles) and from the slope of the elastic loading segments of individual stick-slip events (small black circles). Both measurements indicate an initial increase in stiffness, caused by shear enhanced compaction. In this experiment we explored multiple shearing rates during slow slip (e.g., for events in the range 27-29 mm and 31-33 mm), which had a clear effect on stick-slip amplitude and stiffness.

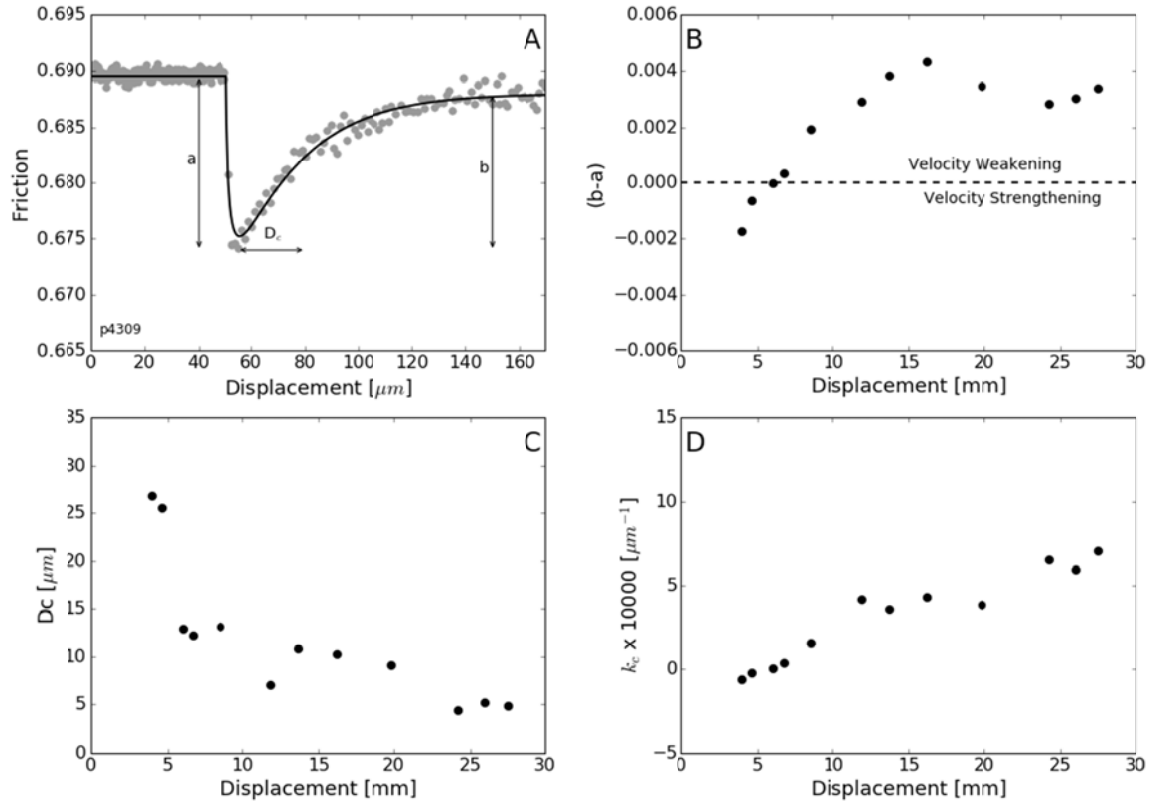

**Supplementary Figure 2 – Rate and State Parameters.** Data and modeling procedure for obtaining rate-and-state friction parameters and their variation with shear displacement. A) Data from experiment p4309 (grey data points) and model (solid line) for a velocity step test from 10 to 1  $\mu\text{m s}^{-1}$ , with illustration of the friction direct effect  $a$ , evolution effect  $b$ , and critical slip distance  $D_c$ . B) Evolution of  $(b-a)$  with shear displacement (see also Figure 3A). Note the transition from rate strengthening to rate weakening at  $\sim 8$  mm displacement, after which a steady-state behavior is reached. C) The critical slip distance decreases with shear displacement as frictional steady-state is reached. D) Evolution of the critical stiffness ( $k_c$ ) with slip.

## Supplementary Tables

| Experiment | Blocks        | Normal Stress [MPa] | Humidity [%] | Comments            | Unload/Reload Cycles |
|------------|---------------|---------------------|--------------|---------------------|----------------------|
| p4224      | Ti/Acrylic    | 5                   | 16           | Stable – Vel. Steps | N                    |
| p4228      | Steel         | 4                   | 100          | Stable – Slide Hold | N                    |
| p4229      | Ti/Acrylic    | 4                   | 100          | Failed              | N                    |
| p4248      | Ti/Acrylic    | 4                   | 100          | Stable – Vel. Steps | N                    |
| p4249      | Ti/Acrylic    | 4                   | 100          | Stable – Vel. Steps | N                    |
| p4267      | Ti/Acrylic    | 2                   | 100          | Stable – Vel. Steps | Y                    |
| p4268      | Ti/Acrylic    | 8                   | 100          | Slow-Slip           | Y                    |
| p4269      | Steel         | 4                   | 100          | Stable – Vel. Steps | Y                    |
| p4270      | Steel         | 2                   | 100          | Stable – Vel. Steps | Y                    |
| p4271      | Ti/Acrylic    | 2                   | 100          | Stable – Vel. Steps | Y                    |
| p4272      | Ti/Acrylic    | 8                   | 100          | Slow-Slip           | Y                    |
| p4273      | Steel         | 8                   | 100          | Stable – Vel. Steps | Y                    |
| p4309      | Steel         | 8                   | 100          | Stable – Vel. Steps | Y                    |
| p4310      | Ti/Acrylic    | 8                   | 100          | Slow-Slip           | Y                    |
| p4311      | Ti/Acrylic    | 8                   | 100          | Slow-Slip           | Y                    |
| p4312      | Steel/Acrylic | 8                   | 100          | Slow-Slip           | Y                    |
| p4313      | Ti/Acrylic    | 8                   | 100          | Slow-Slip           | Y                    |
| p4314      | Steel         | 12                  | 100          | Stable – Vel. Steps | Y                    |
| p4316      | Ti/Acrylic    | 12                  | 100          | Stick-Slip          | Y                    |
| p4317      | Steel/Acrylic | 12                  | 100          | Stick-Slip          | Y                    |
| p4327      | Steel         | 6                   | 100          | Stable – Vel. Steps | Y                    |
| p4328      | Ti/Acrylic    | 6                   | 100          | Slow-Slip           | Y                    |
| p4329      | Ti/Acrylic    | 6                   | 100          | Slow-Slip           | Y                    |
| p4330      | Steel         | 6                   | 100          | Stable – Vel. Steps | Y                    |
| p4338      | Ti/Acrylic    | 4                   | 100          | Stable – Vel. Steps | Y                    |
| p4339      | Steel         | 4                   | 100          | Stable – Vel. Steps | Y                    |
| p4340      | Ti/Acrylic    | 8                   | 100          | Slow-Slip           | Y                    |
| p4341      | Steel         | 12                  | 100          | Stable – Vel. Steps | Y                    |
| p4342      | Ti/Acrylic    | 12                  | 100          | Slow/Fast Slip      | N                    |
| p4343      | Steel/Acrylic | 6                   | 100          | Slow-Slip           | N                    |
| p4344      | Ti/Acrylic    | 7                   | 100          | Slow-Slip           | N                    |
| p4345      | Steel/Acrylic | 8                   | 100          | Slow-Slip           | N                    |
| p4346      | Ti/Acrylic    | 9                   | 100          | Slow-Slip           | N                    |
| p4347      | Steel/Acrylic | 10                  | 100          | Slow/Fast Slip      | N                    |
| p4348      | Ti/Acrylic    | 11                  | 100          | Slow/Fast Slip      | N                    |
| p4350      | Steel/Acrylic | 13                  | 100          | Slow/Fast Slip      | N                    |
| p4351      | Ti/Acrylic    | 14                  | 100          | Slow/Fast Slip      | N                    |
| p4381      | Steel         | 4                   | 100          | Stable – Vel. Steps | N                    |
| p4382      | Ti            | 4                   | 100          | Stable – Vel. Steps | N                    |

**Supplementary Table 1 – Summary of experiments.** Tests were conducted at 100% relative humidity to obtain repeatable results. Shear loading stiffness was varied by using different combinations of forcing blocks (steel, titanium, and acrylic) and normal stress. Unload-reload cycles were used to measure the evolution of stiffness with shear displacement.
